# Supplementary material for: Synergistic sulfonyl–ether polyimide binders for stabilized high-loading NCM811 cathodes in high-energy lithium-ion batteries
Source: Royal Society of Chemistry journal article supplement (doi:10.1039/d5ta06021d), 2025-01-01
Supplement: d5ta06021d1.pdf [file d5ta06021d1.pdf]

## Supporting Information

### **Synergistic sulfonyl-ether polyimide binders for stabilized high-loading NCM811 cathodes in high-energy lithium-ion batteries**

Xia Yan<sup>a,b#</sup>, Shuanyan Kang<sup>b#</sup>, Lin Chen<sup>c</sup>, Qinghai Chen<sup>b</sup>, Junhao Xin<sup>b</sup>, Zixin Lv<sup>b</sup>,  
Zhaozan Xu<sup>a,\*</sup>, Quanyuan Zhang<sup>c,\*</sup>, Nanwen Li<sup>d,\*</sup>

<sup>a</sup>Shanxi Collaborative Innovation Center of High Value-added Utilization of Coal-related Wastes, Institute of Resources and Environmental Engineering, Shanxi University, Taiyuan, 030006, China.

<sup>b</sup>State Key Laboratory of Coal Conversion, Institute of Coal Chemistry, Chinese Academy of Sciences, Taiyuan 030001, China.

<sup>c</sup>Ministry of Education Key Laboratory for the Green Preparation and Application of Functional Materials, Hubei Key Laboratory of Polymer Materials, School of Materials Science and Engineering, Hubei University, Wuhan 430062, China.

<sup>d</sup>Faculty of Materials Science and Energy Engineering, Shenzhen University of Advanced Technology, Shenzhen, 518107, China.

# equal contribution

\*Corresponding author: Z. Xu (E-mail: [zhaozanxu@sxu.edu.cn](mailto:zhaozanxu@sxu.edu.cn)); Q. Zhang (E-mail: [qyzhang142918@hotmail.com](mailto:qyzhang142918@hotmail.com)); N. Li (E-mail: [linanwen@suat-sz.edu.cn](mailto:linanwen@suat-sz.edu.cn))



## 1 Supplementary Note S1

2 EIS method: According to the Warburg diffusion in the low-frequency region, the  
3 diffusion coefficient of the  $\text{Li}^+$  ion(D) is calculated using the following equation:

$$D = 0.5 \left( \frac{RT}{n^2 F^2 A C A_w} \right)^2 \quad (1)$$

4 where R is the ideal gas constant, T is the absolute temperature, F is the Faraday  
5 constant, C is the concentration of  $\text{Li}^+$  in the unit cell, A is the surface area of  
6 electrode in  $\text{cm}^2$ , n is the number of electrons per molecule during the  
7 charge/discharge process, and  $A_w$  is the Warburg factor, which is related to  $Z'$

## 9 Supplementary Note S2

10 GITT method: The lithium diffusion coefficient ( $D_{\text{Li}^+}$ ) for the cathodes is derived  
11 from Equation 2:

$$D_{\text{Li}^+} = \frac{4}{\pi \tau} \left( \frac{m_B V_m}{M_B S} \right)^2 \left( \frac{\Delta E_s}{\Delta E_\tau} \right)^2 \quad (2)$$

13 Where  $\tau(\text{s})$  is the duration of the current pulse.  $m_B$  (g) and  $M_B$  ( $\text{g mol}^{-1}$ ) represent the  
14 mass and molecular weight for the material, respectively.  $V_m(\text{cm}^3 \text{mol}^{-1})$  is the molar  
15 volume for the active material, obtained from standard crystallographic data. S ( $\text{cm}^2$ )  
16 is the surface area of the active material, obtained from standard crystallographic  
17 data. S ( $\text{cm}^2$ ) is the surface area of the active material in the cathode.  $\Delta E_s$  is the steady-  
18 state voltage change due to the current pulse, and  $\Delta E_\tau$  is the voltage change during the  
19 constant current pulse.

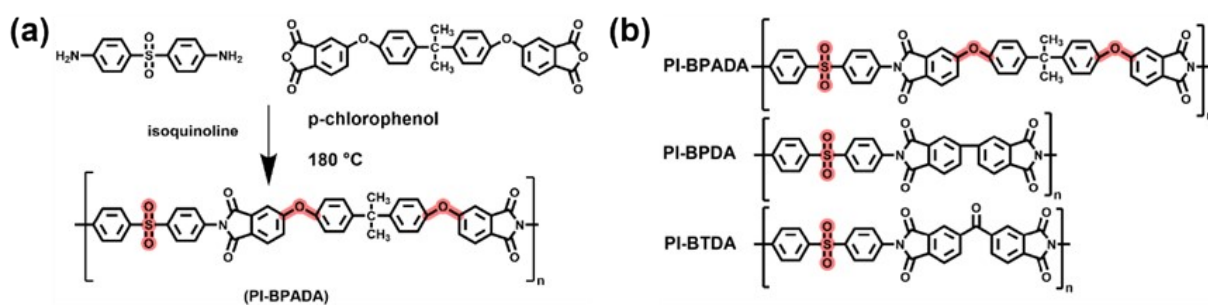

21 **Scheme S1.** (a) PI-BPADA binder synthesis. (b) Chemical structures of synthesized PI binders.



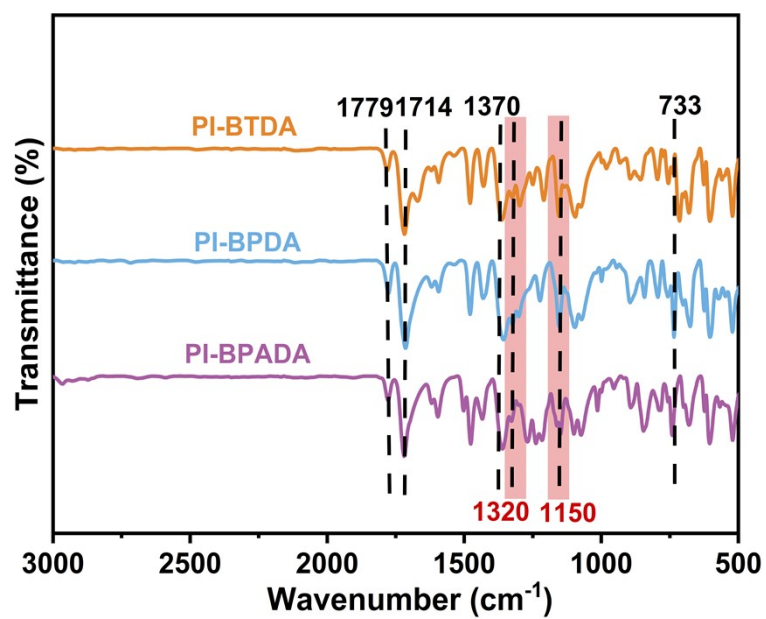

**Fig. S1.** FTIR spectra of the synthesized PI binders.

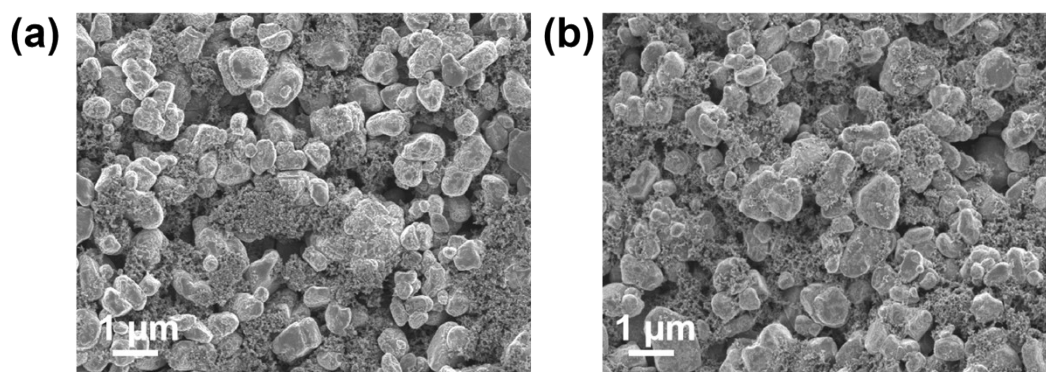

**Fig. S2.** SEM images of initial NCM811 Cathodes with (a) PI-BPDA binder and (b) PI-BTDA binder.



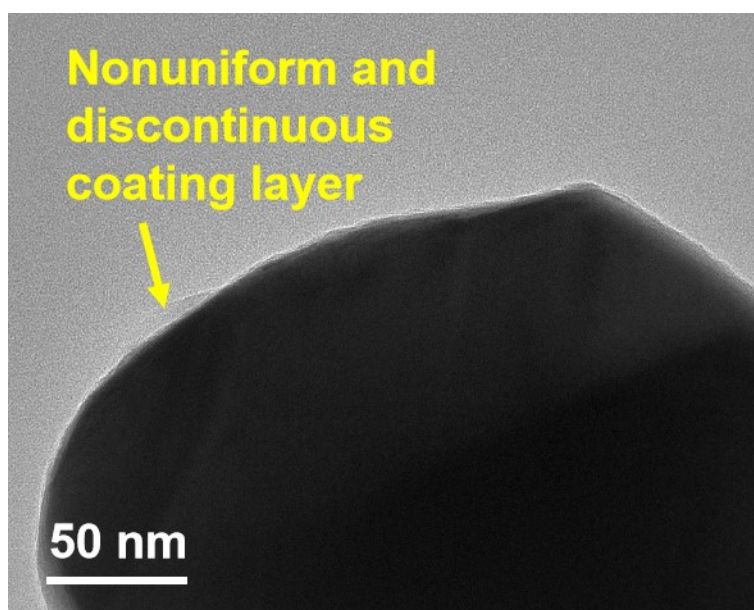

1

2 **Fig. S3.** The TEM image with low-magnification and large view files of initial  
 3 PVDF/NCM cathode.

4

5

6 **Table S1**

7 Peel strength of NCM811 cathodes using PVDF or PI as binders

| Materials    | Average force<br>(N) | Peel strength<br>(N mm <sup>-1</sup> ) |
|--------------|----------------------|----------------------------------------|
| PI-BPADA/NCM | 9.28                 | 0.42                                   |
| PI-BPDA/NCM  | 8.55                 | 0.39                                   |
| PI-BTDA/NCM  | 10.86                | 0.42                                   |
| PVDF/NCM     | 7.31                 | 0.24                                   |



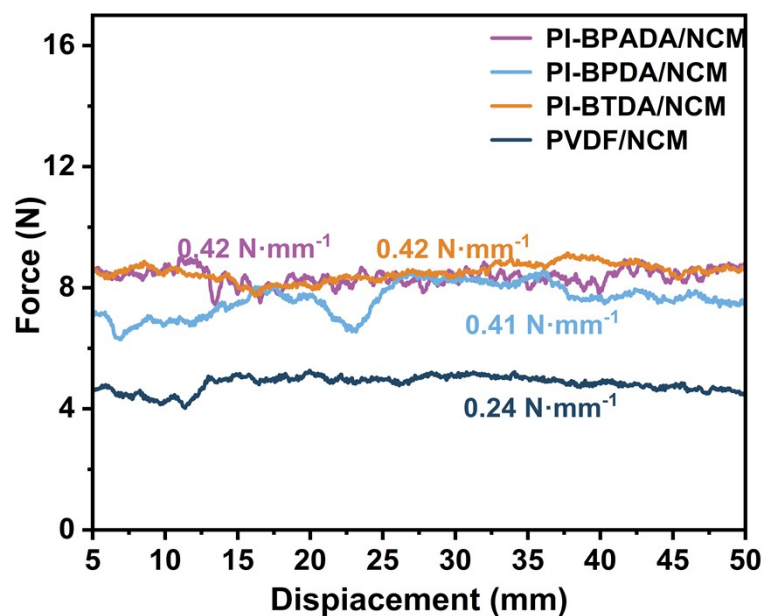

1

2 **Fig. S4.** Peel strength of NCM811 cathodes with PVDF/MCM and PI/NCM.

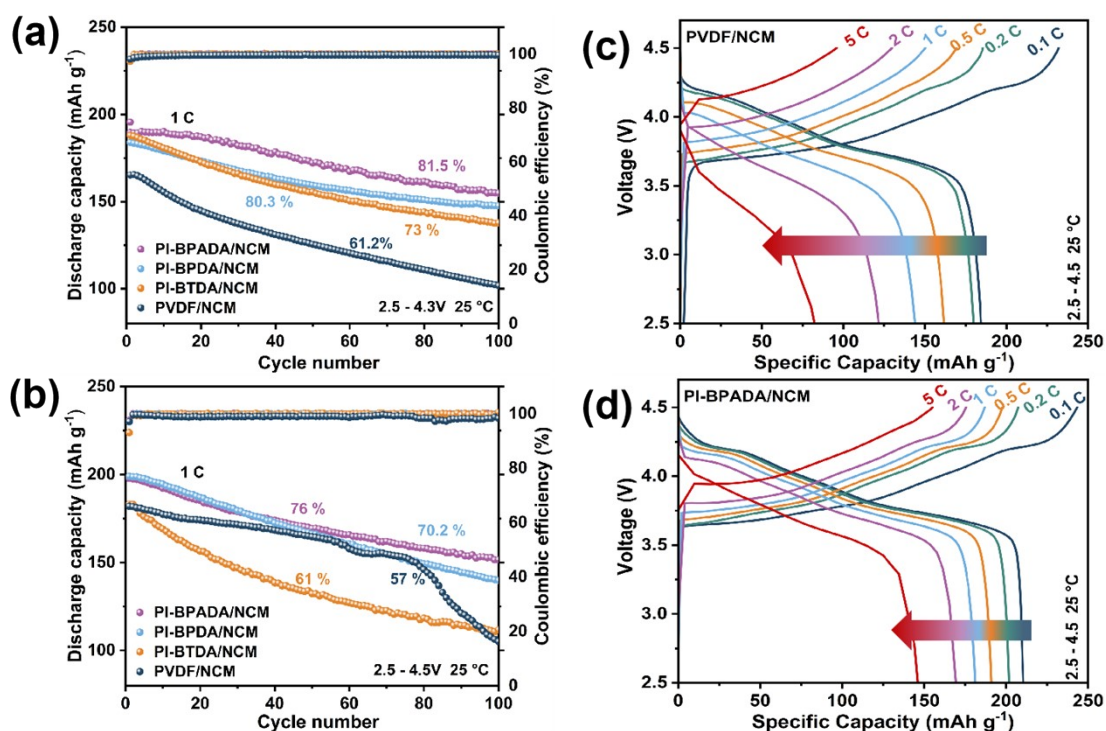

3

4 **Fig. S5.** Cycling performance of NCM811 cathodes with different binders after 100  
5 cycling at 1C in the voltage range of (a) 2.5-4.3 V and (b) 2.5-4.5 V. Voltage profiles  
6 corresponding rate performance for different cycles in the voltage range of 2.5-4.3 V,  
7 (c) PVDF/NCM and (d) PI-BPADA/NCM cathodes.

8



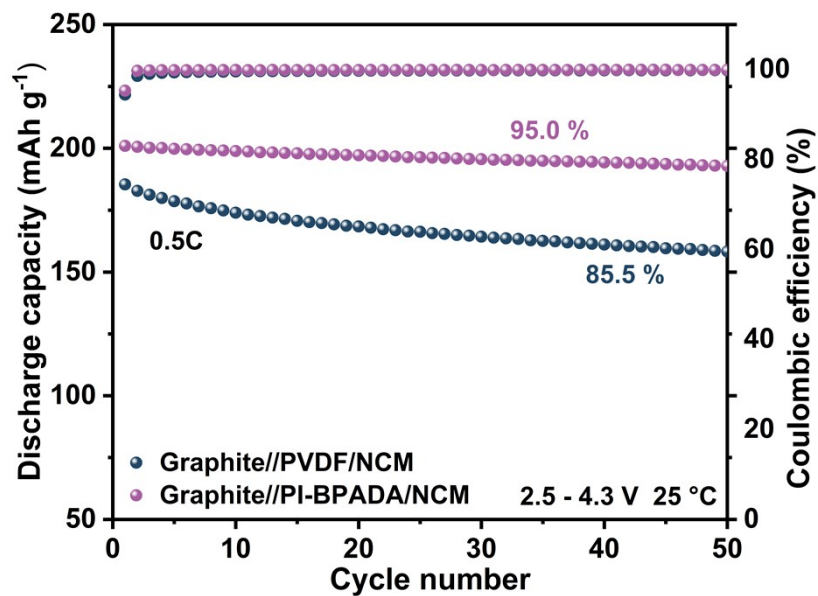

1 **Fig. S6.** Cycling performance of graphite||NCM811 full cells employing PVDF or PI-  
 2 BPADA as the cathode binder

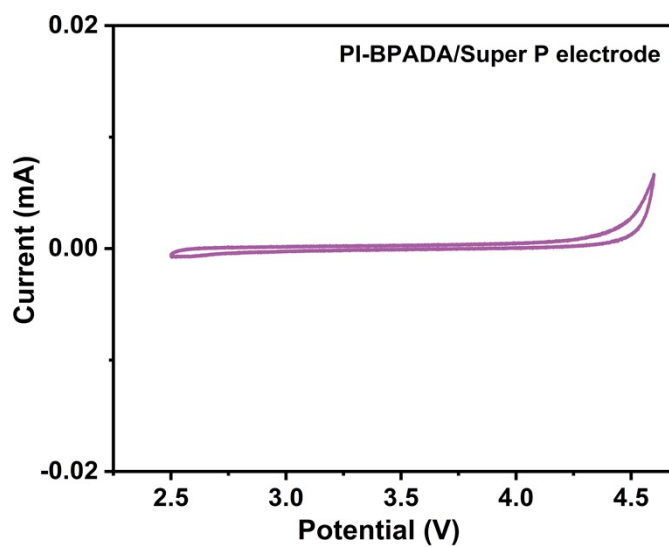

5  
 6 **Fig. S7.** CV Curve of the cathode with PI-BPADA + Super P on Al current collector  
 7 with a scan rate of 0.1 mV s<sup>-1</sup>.



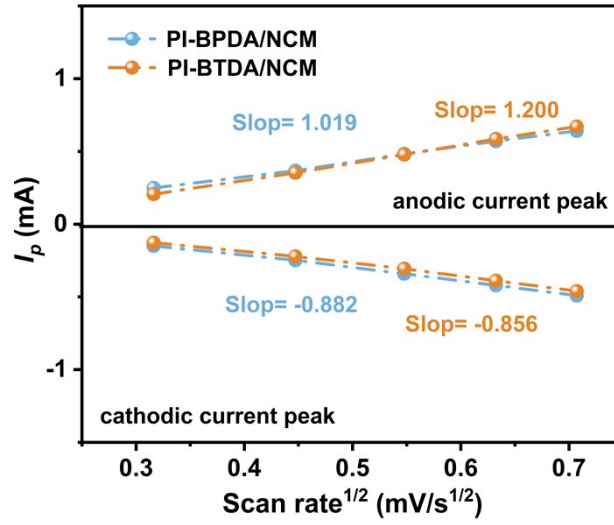

1 **Fig. S8.** Linear response of the peak current density ( $I_p$ ) as a function of square root of  
2 scan rate for PI-BPDA/NCM cell and PI-BTDA/NCM cell.

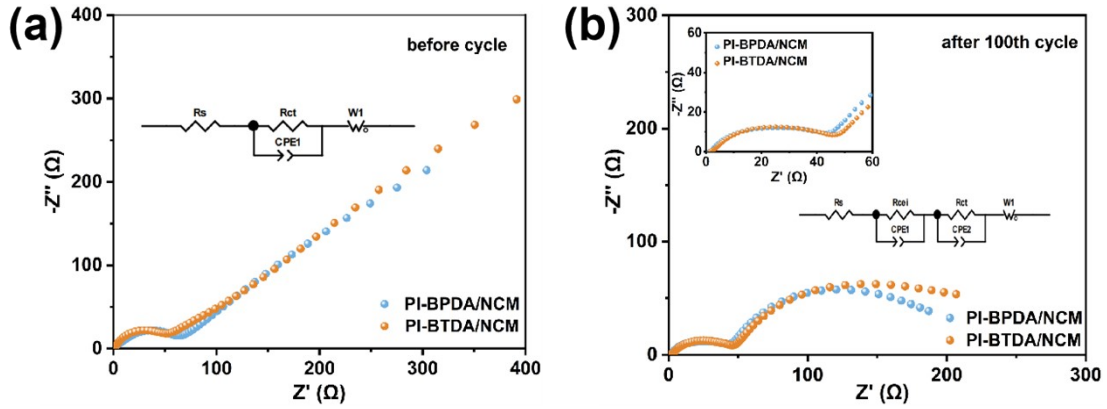

3 **Fig. S9.** Nyquist plots of PI-BPDA/NCM and PI-BTDA/NCM (a) at the initial state  
4 and (b) after 100 cycles in the voltage range of 2.5-4.3 V at 0.2C; insets are equivalent  
5 circuit models for fitting impedance spectra of initial and cycled cells.



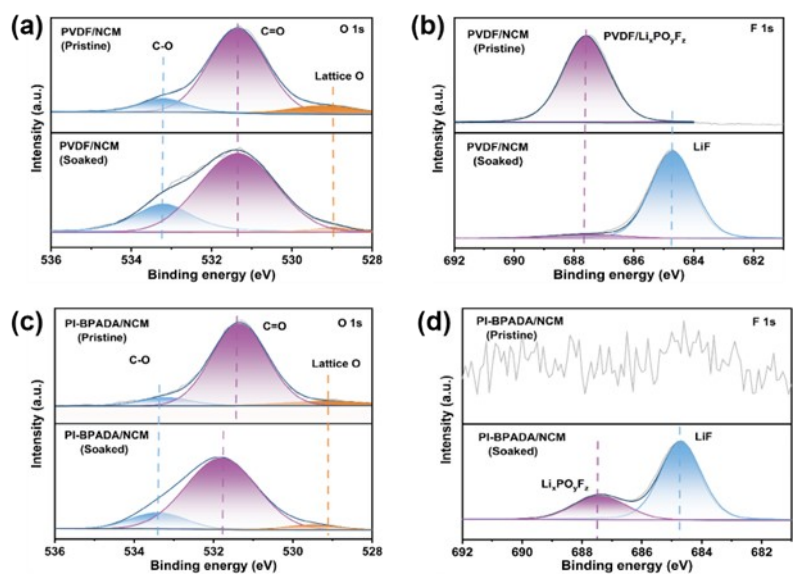

**Fig. S10.** O 1s and F 1s XPS spectra of (a,b) PVDF/NCM and (c,d) PI-BPADA/NCM electrodes for pristine and after soaking in electrolyte for 48h.

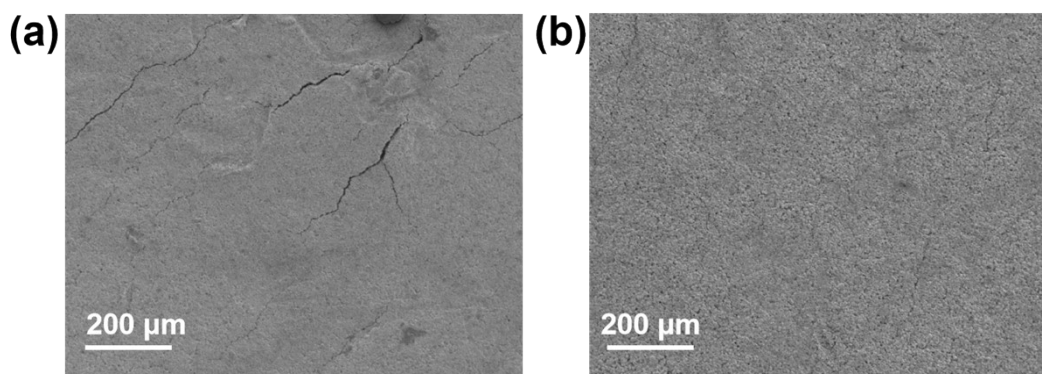

**Fig. S11.** SEM images of the (a) PVDF/NCM cathode and (b) PI-BPADA/NCM cathode after 100 cycles of cell in the voltage window of 2.5-4.3V.
